# Supplementary material for: MPK3- and MPK6-mediated VLN3 phosphorylation regulates actin dynamics during stomatal immunity in Arabidopsis
Source: PubMed Central journal article supplement (PMC8578381; doi:10.1038/s41467-021-26827-2), 2021-11-09
Supplement: 41467_2021_26827_MOESM1_ESM.pdf [file 41467_2021_26827_MOESM1_ESM.pdf]

1 **Supplementary information**

| Clone                         | Forward Primer                                                        | Reverse Primer                                                                     |
|-------------------------------|-----------------------------------------------------------------------|------------------------------------------------------------------------------------|
| <i>VLN3</i>                   | 5'CATGGACGAGCTGTACAAGGGTACCAT<br>GTCTGGGTCAACAAAAGTATTGGATC -3'       | 5'GTGGACTCCTCTTAGAATTCCCGG<br>GTTAGAATAAGTTGAATTTCTTCTTCA<br>GTAAGTCTTG -3'        |
| <i>C-VLN3</i>                 | 5'ACGGGGGACGAGCTCGGTACCATGTC<br>TACTAAAGCTACTGTGCAAG -3'              | 5'-<br>AACATCGTATGGGTAGTTCGACGAATA<br>AGTTGAATTTCTTCTTCA -3'                       |
| <i>C-VLN3<sup>S779A</sup></i> | 5'-<br>TTCTTCTGGGAGAACAAGCGCTCCGAGC<br>CGAGACAGATCAAATGGAAGT -3'      | 5'-<br>ACTTCCATTTGATCTGTCTCGGCTCG<br>GAGCGCTTGTCTCCAGAAGAA -3'                     |
| <i>C-VLN3<sup>S779D</sup></i> | 5'-<br>TTCTTCTGGGAGAACAAGCGATCCGAGC<br>CGAGACAGATCAAATGGAAGT-3'       | 5'-<br>ACTTCCATTTGATCTGTCTCGGCTCG<br>GATCGCTTGTCTCCAGAAGAA-3'                      |
| <i>C-VLN3<sup>S850A</sup></i> | 5'-<br>CACCTGATACCGCTCCTTCTGCTGAAGC<br>AAAAGAT-3'                     | 5'-<br>CAGCAGAAGGAGCGGTATCAGGTGA<br>TTTCTTCTTCT-3'                                 |
| <i>C-VLN3<sup>S850D</sup></i> | 5'-<br>CACCTGATACCGATCCTTCTGCTGAAGCA<br>AAAGAT-3'                     | 5'-<br>CAGCAGAAGGATCGGTATCAGGTGA<br>TTTCTTCTTCT-3'                                 |
| <i>C-VLN3<sup>S809A</sup></i> | 5'-<br>GCATTCAATTCTGCTCCATCATCAAAGTC<br>ACCTC -3'                     | 5'-<br>GATGGAGCAGAATTGAATGCGGATGT<br>TAAGGC -3'                                    |
| <i>GST-VLN3</i>               | 5'-<br>GTTCTGTTCCAGGGGCCCTGGGATCCA<br>TGTCTGGGTCAACAAAAGTATTGGATC -3' | 5'-<br>CGATGCGGCCGCTCGAGTCGACCCG<br>GGTTAGAATAAGTTGAATTTCTTCTTC<br>AGTAAGTCTTG -3' |
| <i>GST-N-VLN2</i>             | 5'-<br>GTTCTGTTCCAGGGGCCCTGGGATCCA<br>TGTCACAAAAGTGTGGATCCT-3'        | 5'-<br>CGATGCGGCCGCTCGAGTCGACCCG<br>GGCTAATCCCAAGAAAAGTAAGTGGT<br>GAA-3'           |
| <i>GST-C-VLN2</i>             | 5'-<br>GTTCTGTTCCAGGGGCCCTGGGATCCA<br>TGGCCACTAAAGCTATCGTACAAG -3'    | 5'-<br>CGATGCGGCCGCTCGAGTCGACCCG<br>GGCTAGAACAAGTCGAACTTCTTCTT<br>AAGCA -3'        |
| <i>GST-C-VLN3</i>             | 5'-<br>ACGCGTCGACTAATGTCTACTAAAGCTAC<br>TGTGCAAG-3'                   | 5'-<br>ATAAGAATGCGGCCGCTTAGAATAAG<br>TTGAATTTCTTCTTCA-3'                           |
| <i>GST-N-VLN3</i>             | 5'-<br>ACGCGTCGACTAATGTCTGGGTCAACAA<br>AAGTATT-3'                     | 5'-<br>ATAAGAATGCGGCCGCTTAATCCCAT<br>GAAAATAAGTGG -3'                              |

2  
3  
4  
5

**Supplementary Table 1. DNA primers used for the cloning of various constructs described in this study.**

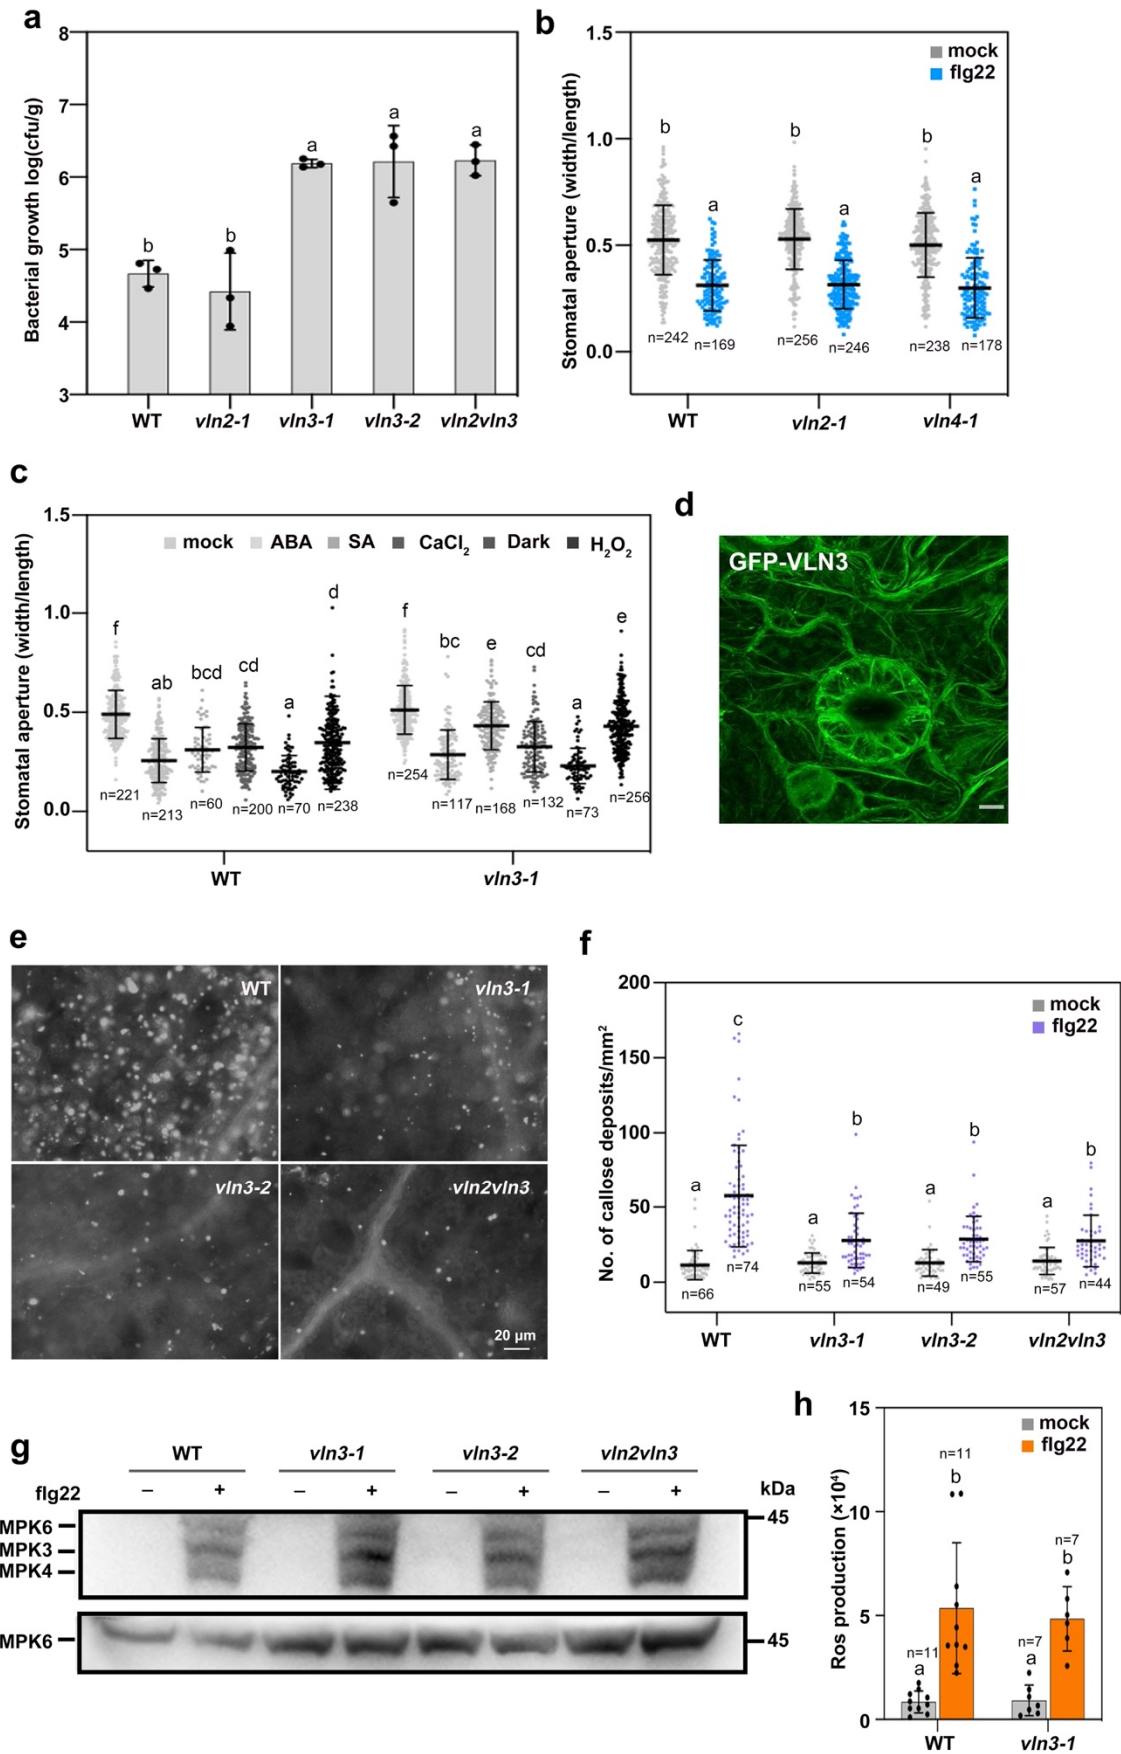

6

7 Supplementary Figure 1. PTI responses in the *vln3* mutant.

8 (a) Bacterial growth was examined in WT, *vln2-1*, *vln3-1*, *vln3-2* and *vln2vln3* mutants.  
9 Plants of indicated genotypes were sprayed with DC3000. Bacterial growth was  
10 measured at 2 dpi. (b) Stomatal aperture in different *vln* mutants treated with flg22.  
11 (c) Stomatal aperture was measured in epidermal peels treated with mock, 100  $\mu$ M  
12 SA, 10  $\mu$ M ABA, 100  $\mu$ M CaCl<sub>2</sub>, 100  $\mu$ M H<sub>2</sub>O<sub>2</sub> or dark for 1 hr. (d) Localization of GFP-  
13 VLN3 expressed from the native VLN3 promoter. Scale bar, 10  $\mu$ m. (e,f) Number of  
14 callose deposits indicated by aniline blue-stained spots was quantified in WT and  
15 mutants following mock, 1  $\mu$ M flg22 treatment for 24 hr. (g) MAPK activation in WT  
16 and mutants in response to treatment with 1  $\mu$ M flg22 for 10 min. Total protein extracts  
17 were probed with anti-MPK6 or anti-p44/42 MAPK to assess MPK6 protein levels or  
18 phosphorylation of MPK3, MPK4 and MPK6, respectively. (h) Apoplastic ROS  
19 production was measured on 4-week-old leaf disks upon 1  $\mu$ M flg22 treatment using  
20 a luminescence assay. Photon counts at peaks were shown in WT and mutant. Value  
21 are means  $\pm$  SD. n=3 for bacterial growth measurements. Sample sizes in (b,c,f,h) are  
22 indicated. Different letters indicate significant differences at P<0.05, as determined by  
23 two-way ANOVA with Tukey's multiple comparisons test. The exact p-values are  
24 provided in the Source Data file.

25

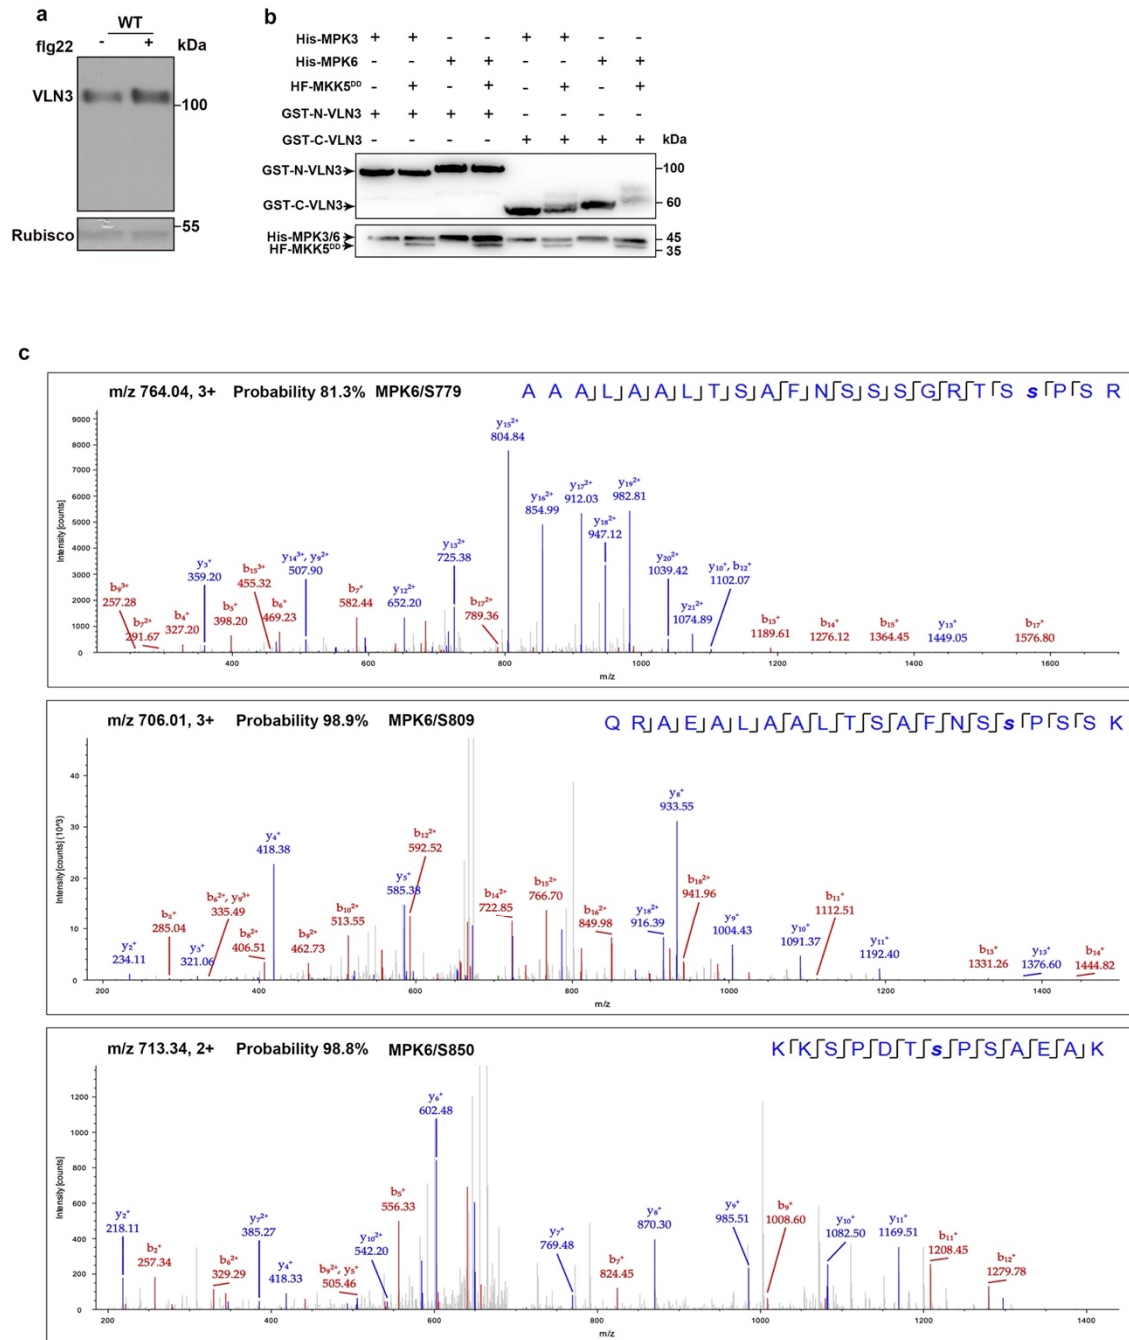

26

27 **Supplementary Figure 2. Phosphosites identification.**

28 (a) Full-length VLN3 tagged with HA was expressed in Arabidopsis protoplasts.  
 29 Following treatment with mock or 100 nM flg22 for 10 min, total protein was separated  
 30 in a phos-tag gel and VLN3 was detected by anti-HA antibodies. Rubisco was used  
 31 as a loading control. (b) Activated MPK3 and MPK6 phosphorylate C terminus of VLN3  
 32 in vitro. The N- and C-terminal fragments of VLN3 were incubated with MPK3 or MPK6  
 33 in an in vitro kinase assay. The phosphorylation of VLN3 was detected in a phos-tag  
 34 gel with anti-GST antibodies. MKK5<sup>DD</sup> and MPK3/6 was detected in SDS-PAGE using

35 anti-His antibodies. (c) Mass spectra and identification of VLN3 Ser779, Ser809,  
36 Ser850 phosphorylation by MPK6. The experiments in (a) were repeated twice, and  
37 (b) three times with similar results.

38

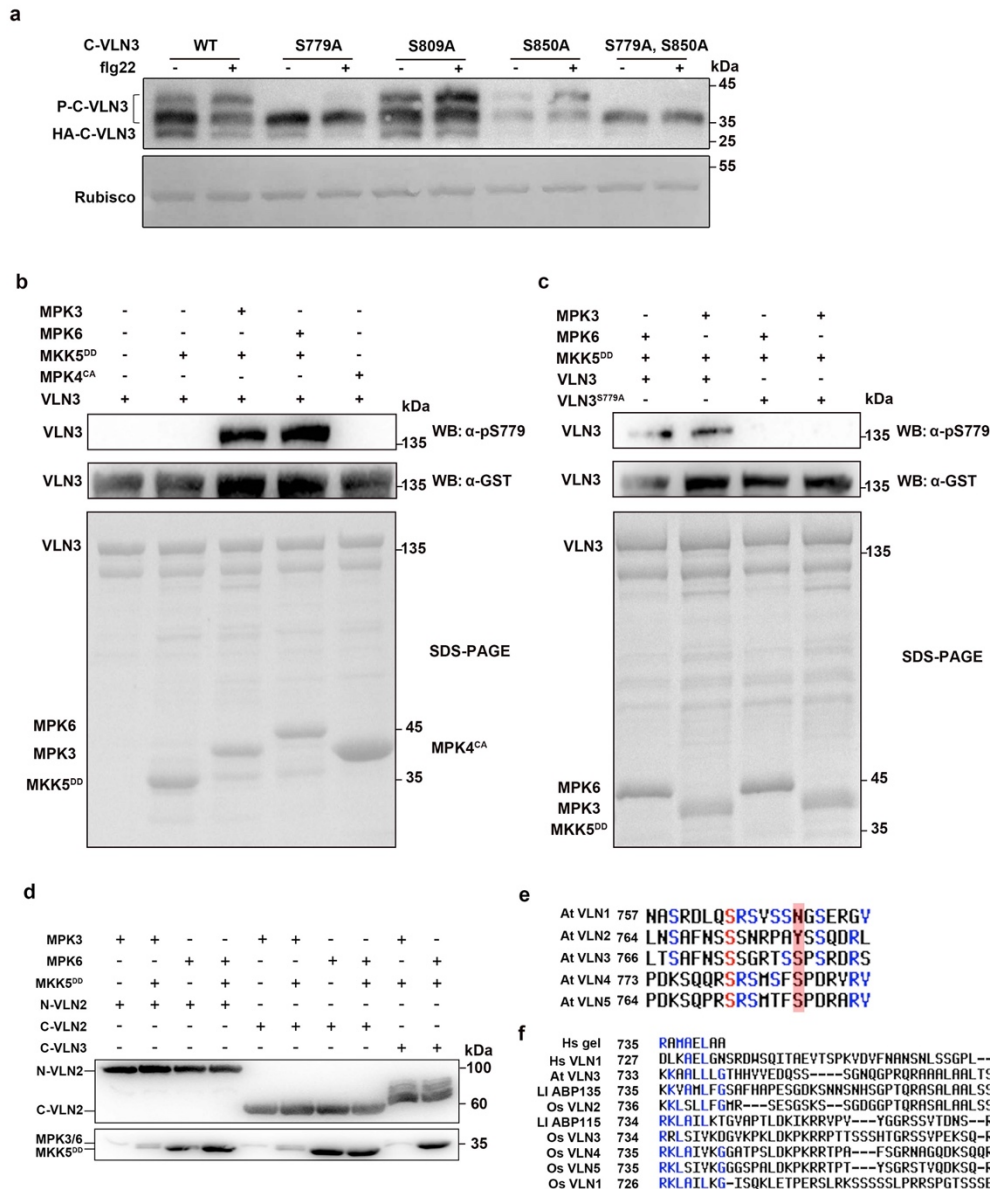

39

40 **Supplementary Figure 3. Ser779 is required for MPK3/6-mediated VLN3**  
 41 **phosphorylation upon flg22 treatment.**

42 (a) HA-tagged WT and mutated C-VLN3 were expressed in Arabidopsis protoplasts.  
 43 Following treatment with mock or 100 nM flg22 for 10 min, total protein was separated  
 44 in a phos-tag gel and VLN3 fragments were detected using anti-HA antibodies.  
 45 Rubisco was used as a loading control. (b) Phospho-antibodies for VLN3 pS779 detect  
 46 VLN3 phosphorylation by MPK3/6, no signal was detected when VLN3 was incubated  
 47 with MPK4<sup>CA</sup> or MKK5<sup>DD</sup>. (c) Anti-pS779 specifically detect WT VLN3, but not  
 48 phosphorylation null VLN3<sup>S779A</sup>. (d) VLN2 is not phosphorylated by MPK3/6. An in vitro  
 49 kinase assay was performed by incubating the N- and C-terminal fragments of VLN2  
 50 (N-VLN2: 1-718 amino acids; C-VLN2: 719-976 amino acids), or C-VLN3 with

51 activated MPK3 or MPK6. Proteins were separated in a phos-tag gel. VLN proteins  
52 were detected with anti-GST antibodies. MKK5<sup>DD</sup> and MPK3/6 was detected in SDS-  
53 PAGE using anti-His antibodies. VLN2 fragments did not show mobility shift as C-  
54 VLN3 did when incubated with activated MPK3/6. (e) Sequence alignment of  
55 Arabidopsis villins showed that Ser779 in VLN3 also exists in VLN4 and VLN5, but not  
56 in VLN1 and VLN2 (red highlighting). (f) Sequence alignment of Arabidopsis VLN3 and  
57 villin-like proteins from rice, lily and human. Ser779 (red highlighting) is not conserved  
58 in plant and human villins. The alignment was performed by MultiAlin algorithm. Amino  
59 acid coordinates are indicated on the left. The experiments in (a-c) were repeated  
60 twice, and (d) three times with similar results.

61

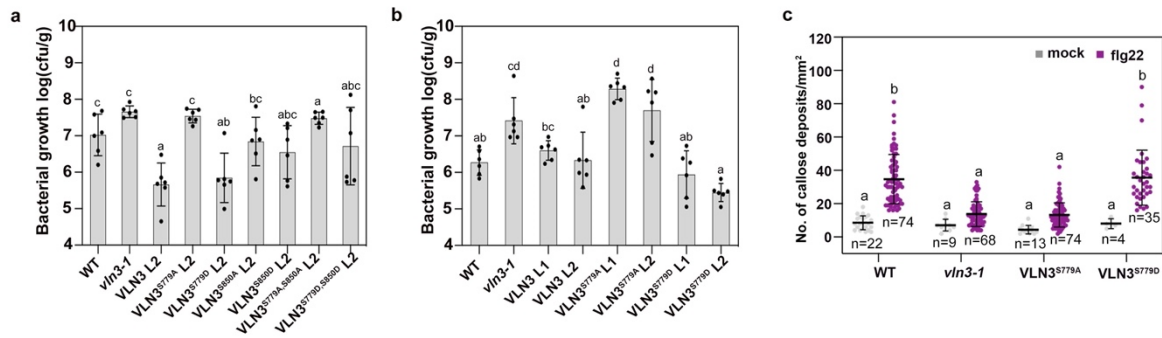

62

63 **Supplementary Figure 4. VLN3 phosphorylation is involved in both stomatal and**  
 64 **apoplastic defenses.**

65 (a) Bacterial growth was determined on the second *vln3* complementary lines by spray  
 66 inoculation. (b) Bacterial growth was determined on indicated plants by infiltration  
 67 inoculation. L1 and L2 indicate two independent transgenic lines. (c) Quantification of  
 68 flg22-induced callose deposits on WT, *vln3* mutant and *vln3* mutant expressing  
 69 VLN3<sup>S779A</sup>, VLN3<sup>S779D</sup>. Value are means  $\pm$  SD. n=6 in (a), n=3 in (b) for bacterial growth  
 70 measurements. The number of images measured in (c) are indicated. Different letters  
 71 indicate significant differences at P<0.05, as determined by two-way ANOVA with  
 72 Tukey's multiple comparisons test. The exact p-values are provided in the Source Data  
 73 file.



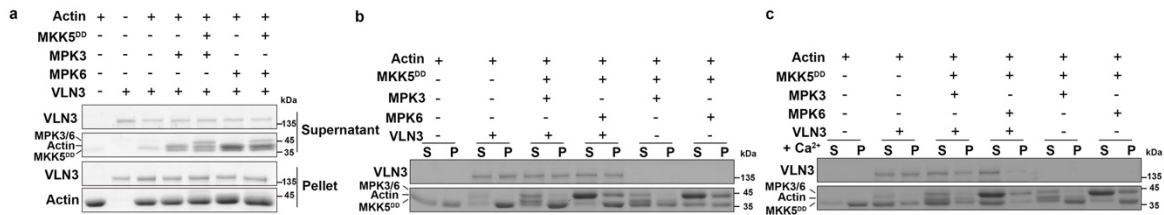

74

75 **Supplementary Figure 5. The effects of VLN3 phosphorylation on actin**  
 76 **dynamics in vitro.**

77 High-speed (a, c) and low-speed (b) cosedimentation assays were used to determine  
 78 the actin binding (a), bundling (b) and severing activity (c) of phosphorylated or  
 79 nonphosphorylated VLN3 in vitro. Prepolymerized F-actin (3  $\mu$ M) was incubated with  
 80 1  $\mu$ M phosphorylated or nonphosphorylated VLN3. Actin binding and bundling assays  
 81 were performed in the presence of 2 mM EGTA, and 100  $\mu$ M free  $Ca^{2+}$  was added in  
 82 severing assays. The supernatants and pellets obtained were subjected to SDS-  
 83 PAGE and Coomassie stained. The experiments in (a-c) were repeated three times  
 84 with similar results.

85

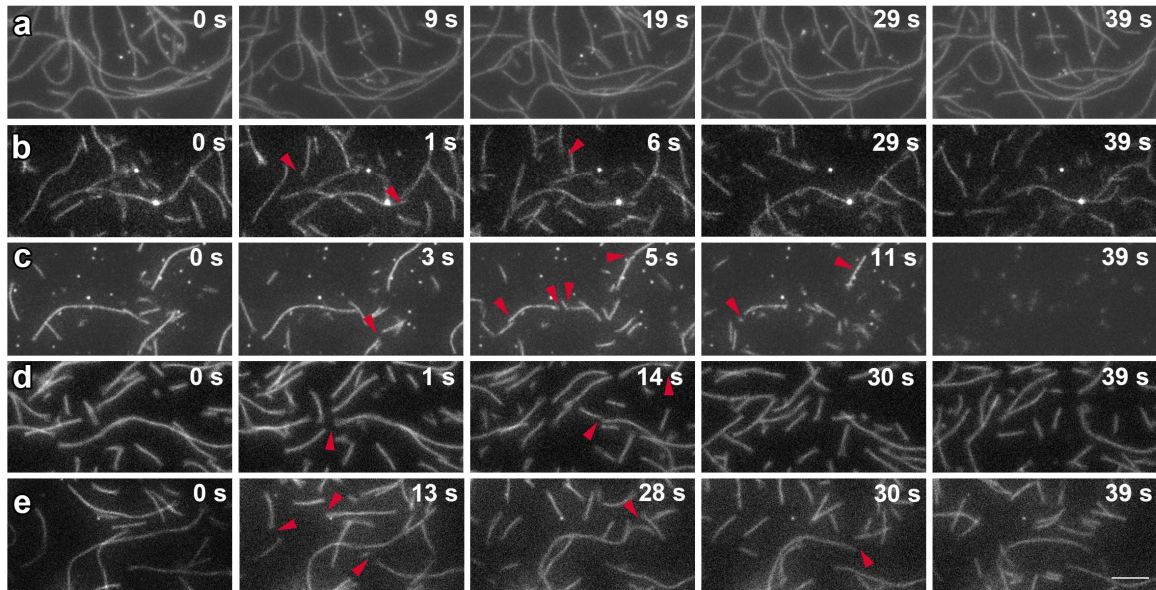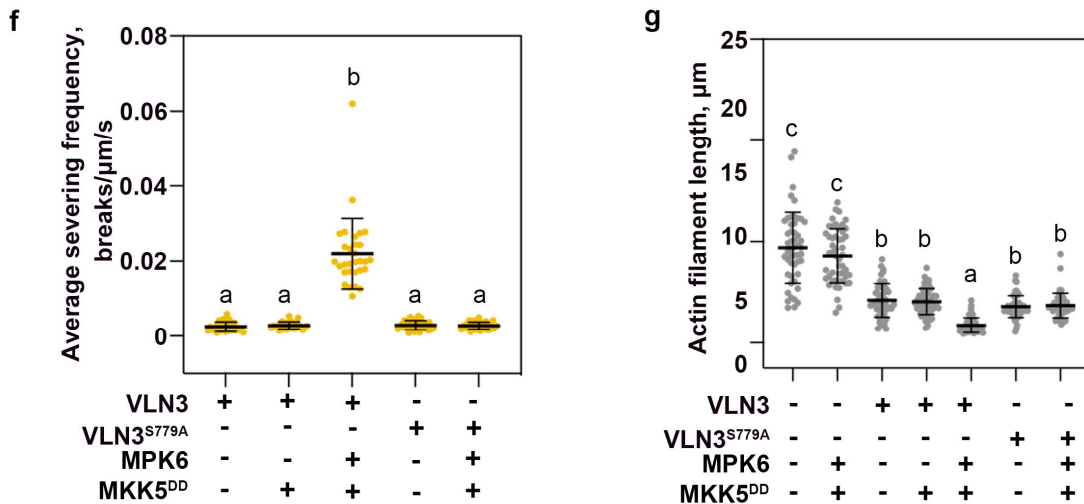

86

87 **Supplementary Figure 6. The TIRF assay shows that VLN3 phosphorylated by**  
 88 **MPK6 exhibits enhanced Ca<sup>2+</sup>-dependent severing activity.**

89 (a-e) VLN3-mediated actin filament severing was visualized by time-lapse TIRF  
 90 microscopy. Oregon-green labeled actin filaments adhered to the cover slip of a  
 91 perfusion chamber, and then 1 nM wild-type or mutant VLN3 in the presence of 10 μM  
 92 free Ca<sup>2+</sup>, was perfused into the chamber and time-lapse images were collected every  
 93 second. Individual filaments showed breaks (arrows) along their length. The elapsed  
 94 time in seconds is given in the top right corner of each image (a, actin + MPK6 +  
 95 MKK5<sup>DD</sup>; b, actin + VLN3; c, actin + VLN3 + MPK6 + MKK5<sup>DD</sup>; d, actin + VLN3<sup>S779A</sup> +  
 96 MPK6 + MKK5<sup>DD</sup>; e, actin + VLN3 + MKK5<sup>DD</sup>). Bars = 5 μm. (f) Severing frequency  
 97 was calculated as the number of breaks per unit filament length per unit time. (g)  
 98 Average actin filament length was measured for each indicated reaction. Value are

99 means  $\pm$  SD. n in (f)=30, in (g)= 50 filaments from at least 5 images for each treatment.  
100 Different letters indicate significant differences at  $P < 0.05$ , as determined by two-way  
101 ANOVA with Tukey's multiple comparisons test. The exact p-values are provided in  
102 the Source Data file.  
103

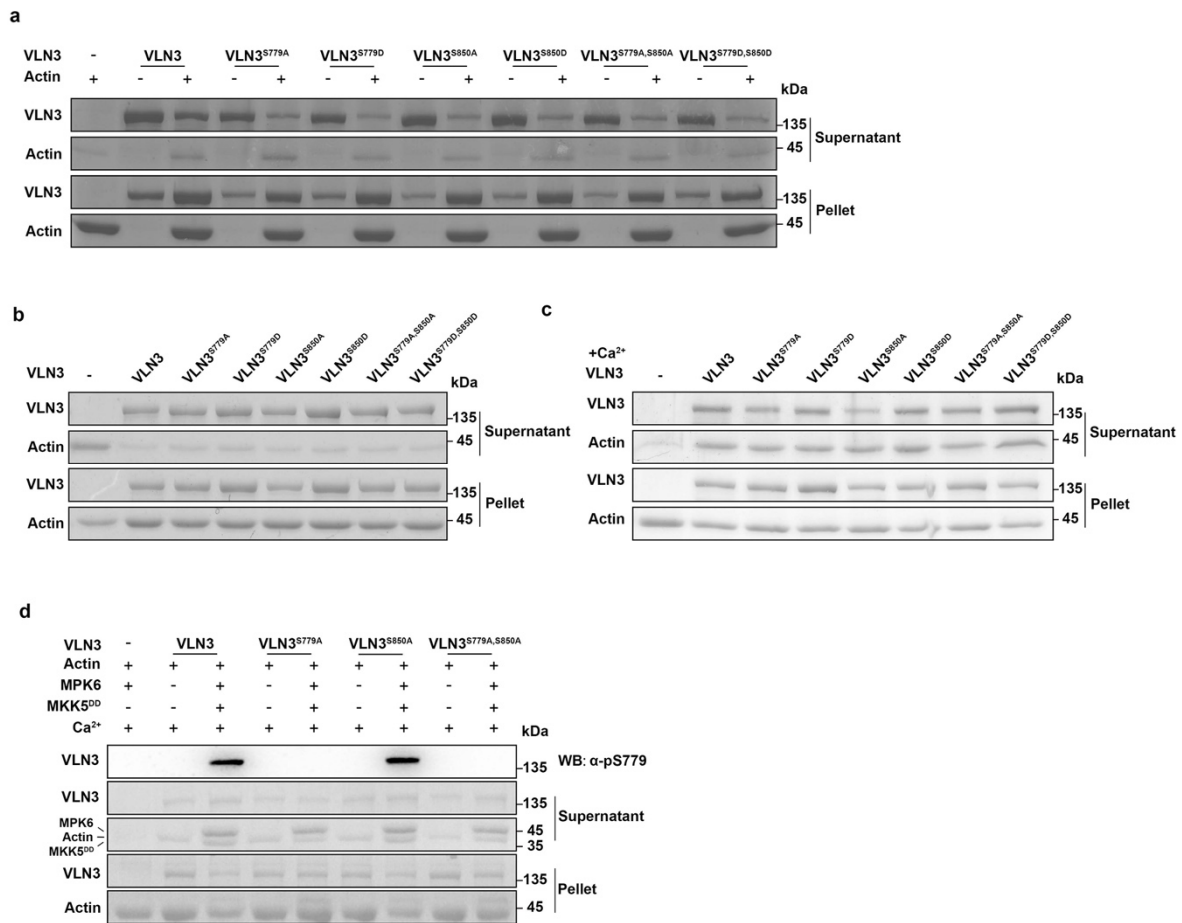

105

### 106 **Supplementary Figure 7. Ser779 phosphorylation is required for the enhanced**

### 107 **filament severing activity of VLN3.**

108 High-speed (a, c) and low-speed (b) cosedimentation assays were used to determine

109 the actin binding (a), bundling (b) and severing activity (c) of wild-type or mutated

110 VLN3 in vitro. (d) High-speed cosedimentation assays were used to determine the

111 actin severing of wild-type or mutated VLN3 in the absence or presence of activated

112 MPK6 (d). Prepolymerized F-actin (3  $\mu$ M) was incubated with 1  $\mu$ M VLN3 proteins.

113 Actin binding and bundling assays were performed in the presence of 2 mM EGTA,

114 and 100  $\mu$ M free Ca<sup>2+</sup> was added in severing assays. The supernatants and pellets

115 obtained were subjected to SDS-PAGE and Coomassie stained. The reaction mixes

116 in (d) were probed with  $\alpha$ -pSer779 to confirm that VLN3 was phosphorylated by MPK6

117 in this assay. The experiments in (a-d) were repeated three times with similar results.

118

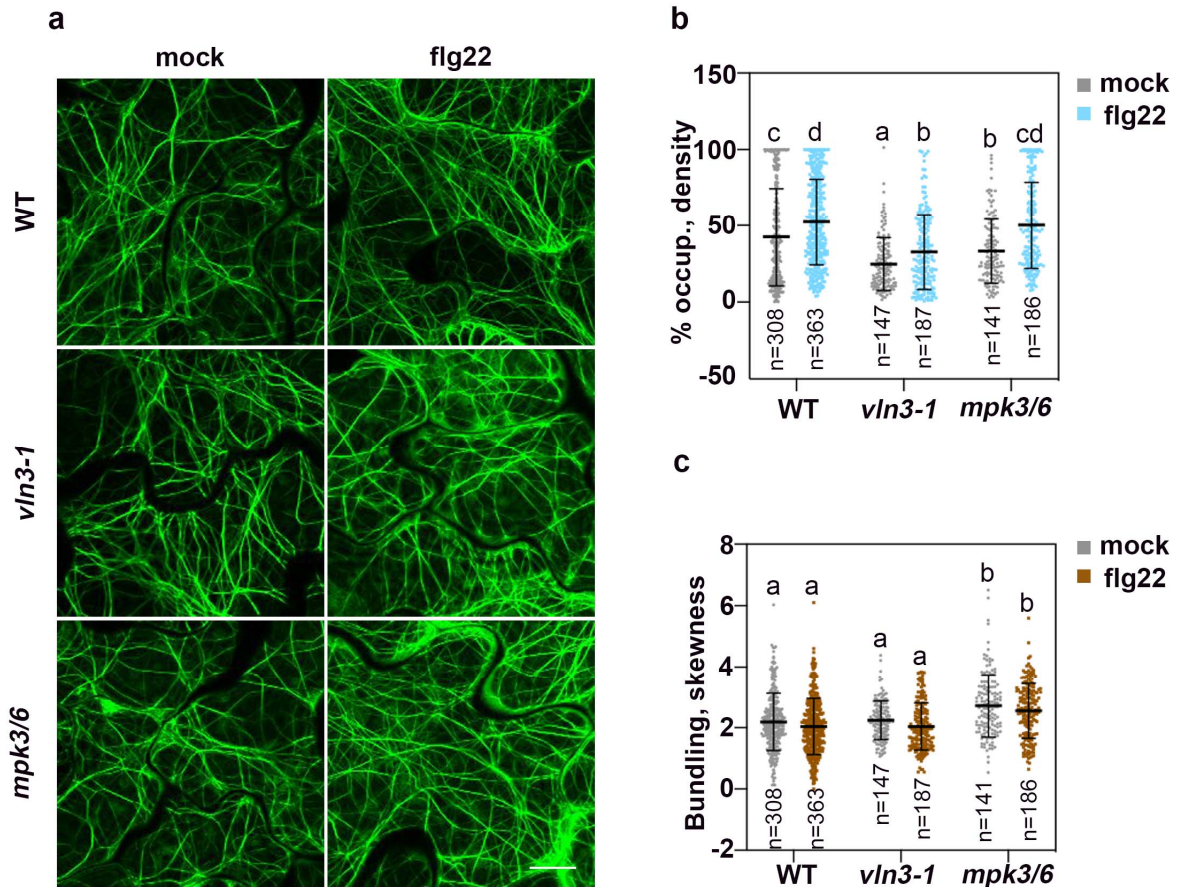

119

120

**Supplementary Figure 8. MPK3/MPK6 and VLN3 are not required for MAMP-triggered actin response in epidermal pavement cells.**

122

(a) Representative images of epidermal cells from WT and mutant rosette leaves

123

treated with flg22. Scale bars = 10  $\mu$ m. (b,c) Actin architecture was measured by

124

density (b) and skewness (c) analyses on wild-type and mutant epidermal cells after

125

treatment with flg22. Values given are means  $\pm$  SD. The number of cells measured

126

are indicated. Different letters indicate significant differences at  $P < 0.05$ , as determined

127

by two-way ANOVA with Tukey's multiple comparisons test. The exact p-values are

128

provided in the Source Data file.

129
