# Supplementary material for: MPK3- and MPK6-mediated VLN3 phosphorylation regulates actin dynamics during stomatal immunity in Arabidopsis
Source: PubMed Central journal article supplement (PMC8578381; doi:10.1038/s41467-021-26827-2), 2021-11-09
Supplement: 41467_2021_26827_MOESM12_ESM.pdf [file 41467_2021_26827_MOESM12_ESM.pdf]

## Reporting Summary

Nature Portfolio wishes to improve the reproducibility of the work that we publish. This form provides structure for consistency and transparency in reporting. For further information on Nature Portfolio policies, see our [Editorial Policies](#) and the [Editorial Policy Checklist](#).

### Statistics

For all statistical analyses, confirm that the following items are present in the figure legend, table legend, main text, or Methods section.

n/a Confirmed

- |                                     |                                     |                                                                                                                                                                                                                                                            |
|-------------------------------------|-------------------------------------|------------------------------------------------------------------------------------------------------------------------------------------------------------------------------------------------------------------------------------------------------------|
| <input type="checkbox"/>            | <input checked="" type="checkbox"/> | The exact sample size ( $n$ ) for each experimental group/condition, given as a discrete number and unit of measurement                                                                                                                                    |
| <input type="checkbox"/>            | <input checked="" type="checkbox"/> | A statement on whether measurements were taken from distinct samples or whether the same sample was measured repeatedly                                                                                                                                    |
| <input type="checkbox"/>            | <input checked="" type="checkbox"/> | The statistical test(s) used AND whether they are one- or two-sided<br><i>Only common tests should be described solely by name; describe more complex techniques in the Methods section.</i>                                                               |
| <input checked="" type="checkbox"/> | <input type="checkbox"/>            | A description of all covariates tested                                                                                                                                                                                                                     |
| <input checked="" type="checkbox"/> | <input type="checkbox"/>            | A description of any assumptions or corrections, such as tests of normality and adjustment for multiple comparisons                                                                                                                                        |
| <input type="checkbox"/>            | <input checked="" type="checkbox"/> | A full description of the statistical parameters including central tendency (e.g. means) or other basic estimates (e.g. regression coefficient) AND variation (e.g. standard deviation) or associated estimates of uncertainty (e.g. confidence intervals) |
| <input type="checkbox"/>            | <input checked="" type="checkbox"/> | For null hypothesis testing, the test statistic (e.g. $F$ , $t$ , $r$ ) with confidence intervals, effect sizes, degrees of freedom and $P$ value noted<br><i>Give <math>P</math> values as exact values whenever suitable.</i>                            |
| <input checked="" type="checkbox"/> | <input type="checkbox"/>            | For Bayesian analysis, information on the choice of priors and Markov chain Monte Carlo settings                                                                                                                                                           |
| <input checked="" type="checkbox"/> | <input type="checkbox"/>            | For hierarchical and complex designs, identification of the appropriate level for tests and full reporting of outcomes                                                                                                                                     |
| <input checked="" type="checkbox"/> | <input type="checkbox"/>            | Estimates of effect sizes (e.g. Cohen's $d$ , Pearson's $r$ ), indicating how they were calculated                                                                                                                                                         |

*Our web collection on [statistics for biologists](#) contains articles on many of the points above.*

### Software and code

Policy information about [availability of computer code](#)

**Data collection** Microscopic images were collected using Carl Zeiss Zen software. The luminescence was recorded using a FlexStation3 (Molecular Devices). The phosphorylation signals were detected by a Typhoon 9410 phosphor imager. Peptide identification and phosphites assignments were performed with the Proteome Discoverer software (version 1.4, Thermo Fisher). TIRF images were collected at 1- to 2-s intervals using ELYRA 7 (Carl Zeiss).

**Data analysis** Images were analyzed using ImageJ/Fiji software (version 2.0.0-rc-68/1.52h). Data were analyzed using graphpad prism software. For correlation coefficient analyses, time-lapse VAEM series were cropped and analyzed using the built-in MATLAB function corr2 defined by Vidali et al. (Vidali, L. et al. Myosin XI is essential for zip growth in Physcomitrella patens. Plant Cell 22, 1868-1882 (2010)).

For manuscripts utilizing custom algorithms or software that are central to the research but not yet described in published literature, software must be made available to editors and reviewers. We strongly encourage code deposition in a community repository (e.g. GitHub). See the Nature Portfolio [guidelines for submitting code & software](#) for further information.

### Data

Policy information about [availability of data](#)

All manuscripts must include a [data availability statement](#). This statement should provide the following information, where applicable:

- Accession codes, unique identifiers, or web links for publicly available datasets
- A description of any restrictions on data availability
- For clinical datasets or third party data, please ensure that the statement adheres to our [policy](#)

The authors declare that all data supporting the findings of this study are included in the manuscript and its supplementary files are available from the corresponding author upon request. Source data are provided with this paper.

## Field-specific reporting

Please select the one below that is the best fit for your research. If you are not sure, read the appropriate sections before making your selection.

- Life sciences     Behavioural & social sciences     Ecological, evolutionary & environmental sciences

For a reference copy of the document with all sections, see [nature.com/documents/nr-reporting-summary-flat.pdf](https://www.nature.com/documents/nr-reporting-summary-flat.pdf)

## Life sciences study design

All studies must disclose on these points even when the disclosure is negative.

|                 |                                                                                                             |
|-----------------|-------------------------------------------------------------------------------------------------------------|
| Sample size     | Sample size was determined for each experiment based on similar data reported in the scientific literature. |
| Data exclusions | No data were excluded from the analyses.                                                                    |
| Replication     | At least two or three independent biological repeats were done for all experiments.                         |
| Randomization   | Data were randomly collected.                                                                               |
| Blinding        | All data collection and analysis were performed as double-blind experiments.                                |

## Reporting for specific materials, systems and methods

We require information from authors about some types of materials, experimental systems and methods used in many studies. Here, indicate whether each material, system or method listed is relevant to your study. If you are not sure if a list item applies to your research, read the appropriate section before selecting a response.

### Materials & experimental systems

|                                     |                                                        |
|-------------------------------------|--------------------------------------------------------|
| n/a                                 | Involved in the study                                  |
| <input type="checkbox"/>            | <input checked="" type="checkbox"/> Antibodies         |
| <input checked="" type="checkbox"/> | <input type="checkbox"/> Eukaryotic cell lines         |
| <input checked="" type="checkbox"/> | <input type="checkbox"/> Palaeontology and archaeology |
| <input checked="" type="checkbox"/> | <input type="checkbox"/> Animals and other organisms   |
| <input checked="" type="checkbox"/> | <input type="checkbox"/> Human research participants   |
| <input checked="" type="checkbox"/> | <input type="checkbox"/> Clinical data                 |
| <input checked="" type="checkbox"/> | <input type="checkbox"/> Dual use research of concern  |

### Methods

|                                     |                                                 |
|-------------------------------------|-------------------------------------------------|
| n/a                                 | Involved in the study                           |
| <input checked="" type="checkbox"/> | <input type="checkbox"/> ChIP-seq               |
| <input checked="" type="checkbox"/> | <input type="checkbox"/> Flow cytometry         |
| <input checked="" type="checkbox"/> | <input type="checkbox"/> MRI-based neuroimaging |

## Antibodies

|                 |                                                                                                                                                                                                                                                                                                                                                                                                                                                                                                                                                                                                                                                                                                                                                                                                                                                                                                                                                                                                                                                                                                                                                                                                                                                                                                                                                                                                                                                                                                                                                                                              |
|-----------------|----------------------------------------------------------------------------------------------------------------------------------------------------------------------------------------------------------------------------------------------------------------------------------------------------------------------------------------------------------------------------------------------------------------------------------------------------------------------------------------------------------------------------------------------------------------------------------------------------------------------------------------------------------------------------------------------------------------------------------------------------------------------------------------------------------------------------------------------------------------------------------------------------------------------------------------------------------------------------------------------------------------------------------------------------------------------------------------------------------------------------------------------------------------------------------------------------------------------------------------------------------------------------------------------------------------------------------------------------------------------------------------------------------------------------------------------------------------------------------------------------------------------------------------------------------------------------------------------|
| Antibodies used | <p>Anti-FLAG (RM1002) (Beijing Ray Antibody Biotech), dilution factor: 1:2000<br/>         Anti-ACTIN (AC009) (ABclonal), dilution factor: 1:2000<br/>         Anti-GFP (RM1008) (Beijing Ray Antibody Biotech), dilution factor: 1:2000<br/>         Anti-MPK6 (A7104) (Sigma-Aldrich), dilution factor: 1:2000<br/>         Anti-p44/42 MAPK (4370) (Cell Signaling Technology), dilution factor: 1:2000<br/>         Anti-GST (RM1005) (Beijing Ray Antibody Biotech), dilution factor: 1:2000<br/>         Anti-HA (RM1004) (Beijing Ray Antibody Biotech), dilution factor: 1:2000<br/>         Anti-pS779 (Abmart), dilution factor: 1:1000</p>                                                                                                                                                                                                                                                                                                                                                                                                                                                                                                                                                                                                                                                                                                                                                                                                                                                                                                                                        |
| Validation      | <p>Anti-FLAG:<a href="http://www.rayantibody.com/index.php?c=product&amp;a=type&amp;tid=12">http://www.rayantibody.com/index.php?c=product&amp;a=type&amp;tid=12</a><br/>         Anti-ACTIN:<a href="https://abclonal.com.cn/catalog/AC009">https://abclonal.com.cn/catalog/AC009</a><br/>         Anti-GFP:<a href="http://www.rayantibody.com/index.php?c=product&amp;a=type&amp;tid=12">http://www.rayantibody.com/index.php?c=product&amp;a=type&amp;tid=12</a><br/>         Anti-MPK6:<a href="https://www.sigmaaldrich.com/catalog/product/roche/11814460001?lang=zh&amp;region=CN">https://www.sigmaaldrich.com/catalog/product/roche/11814460001?lang=zh&amp;region=CN</a><br/>         Anti-p44/42 MAPK:<a href="https://www.cellsignal.cn/products/primary-antibodies/phospho-p44-42-mapk-erk1-2-thr202-tyr204-d13-14-4e-xp-rabbit-mab/4370?site-search-type=Products&amp;N=4294956287&amp;Ntt=4370&amp;fromPage=plp">https://www.cellsignal.cn/products/primary-antibodies/phospho-p44-42-mapk-erk1-2-thr202-tyr204-d13-14-4e-xp-rabbit-mab/4370?site-search-type=Products&amp;N=4294956287&amp;Ntt=4370&amp;fromPage=plp</a><br/>         Anti-GST:<a href="http://www.rayantibody.com/index.php?c=product&amp;a=type&amp;tid=12">http://www.rayantibody.com/index.php?c=product&amp;a=type&amp;tid=12</a><br/>         Anti-HA:<a href="http://www.rayantibody.com/index.php?c=product&amp;a=type&amp;tid=12">http://www.rayantibody.com/index.php?c=product&amp;a=type&amp;tid=12</a><br/>         Anti-pS779:<a href="http://www.ab-mart.com">http://www.ab-mart.com</a></p> |
